# Supplementary material
Source: Springer Nature journal article supplement (https://www.springermedizin.de/resource/supplementary/12889_2011_2825_MOESM1_ESM.pdf/9487504)
Supplement: MOESM1 [file 9487504]

  


Evaluating a selective prevention programme for binge drinking among young adolescents: study protocol of a randomized controlled trial | springermedizin.de


Evaluating a selective prevention programme for binge drinking among young adolescents: study protocol of a randomized controlled trial | springermedizin.de
Skip to main content

Menü

Hauptrubriken

Chevron down icon


Chevron up icon

CME


Facharzt-Training


Webinare


Zeitschriften


Bücher


e.Medpedia


Podcast

Newsletter


Abo-Shop

Service

Chevron down icon


Chevron up icon

Jobbörse


Info & Hilfe

Fachgebiete

Chevron down icon


Chevron up icon

Anästhesiologie


Allgemeinmedizin


Arbeitsmedizin


Augenheilkunde


Chirurgie


Dermatologie


Gynäkologie und Geburtshilfe


HNO


Innere Medizin


Kardiologie


Neurologie


Onkologie und Hämatologie


Orthopädie und Unfallchirurgie


Pädiatrie


Pathologie


Psychiatrie


Radiologie


Rechtsmedizin


Urologie


Zahnmedizin

Themen

Chevron down icon


Chevron up icon

Klimawandel und Gesundheit


Neues aus dem Markt


COVID-19


Praxis und Beruf


Seltene Erkrankungen


GOÄ & EBM


Panorama

Sammlungen

Chevron down icon


Chevron up icon

Kasuistiken


Algorithmen & Infografiken


Blickdiagnosen


Arthropedia


FlapFinder (für Dermatochirurgen)


Videos


Kongressberichterstattung


Medizin für Apothekerinnen und Apotheker


Für Ärztinnen und Ärzte in Weiterbildung


Für Medizinstudierende

#### Live-Webinar "Chronische Unterbauch- und Viszeralschmerzen in der Praxis managen"

Das Thema chronische Unterbauch- und Viszeralschmerzen wird im Live-Webinar am **7. Mai von 17.30 bis 19 Uhr** aus internistischer, gynäkologischer und psychologisch-neurowissenschaftlicher Perspektive beleuchtet. Besprochen werden krankheitsbedingte Ursachen, Mechanismen der kognitiven Schmerzmodulation sowie mögliche Therapieoptionen. Die Fortbildung ist mit 2 CME-Punkten zertifiziert. Melden Sie sich jetzt an!

Springer Medizin

Suche

Search icon

Erweiterte Suche

Anmelden

### Springer Medizin

JAVASCRIPT BENÖTIGT

Bitte aktivieren Sie Java-Script in Ihrem Browser, damit Sie alle Vorteile und Funktionen dieser Website nutzen können.

INTERNET EXPLORER WIRD NICHT MEHR UNTERSTÜZT

Der Internet Explorer wird als Browser seitens Microsoft nicht mehr unterstützt. Für Ihr optimales Nutzungserlebnis wählen Sie bitte Microsoft Edge, Safari, Chrome oder Firefox als Browser.

nach oben

BMC Public Health

Erschienen in:

Open Access
01.12.2011 | Study protocol

# Evaluating a selective prevention programme for binge drinking among young adolescents: study protocol of a randomized controlled trial

Erschienen in:
BMC Public Health 
|
Ausgabe 1/2011

download

DOWNLOAD

print

DRUCKEN

SUCHEN IM ARTIKEL
close

0  /  0

0

Vorherige

Nächste

insite

SUCHEN

download

DOWNLOAD

print

DRUCKEN

Metadaten

Titel
:   Evaluating a selective prevention programme for binge drinking among young adolescents: study protocol of a randomized controlled trial

Publikationsdatum
:   01.12.2011

Erschienen in
:   BMC Public Health 
    / Ausgabe 1/2011
      
    Elektronische ISSN: 1471-2458

DOI
:   https://doi.org/10.1186/1471-2458-11-126

### Weitere Artikel der Ausgabe 1/2011


Zur Ausgabe

Research article

### Are skin disorders related to work strain in hospital workers? A cross-sectional study

Correspondence

### Public health research outputs from efficacy to dissemination: a bibliometric analysis

Research article

### Biological Monitoring of Blood Naphthalene Levels as a Marker of Occupational Exposure to PAHs among Auto-Mechanics and Spray Painters in Rawalpindi

Research article

### Concurrent multiple health risk behaviors among adolescents in Luangnamtha province, Lao PDR

Research article

### Predictors of adherence to isoniazid preventive therapy among HIV positive adults in Addis Ababa, Ethiopia

Research article

### Maximising retention in a longitudinal study of genital Chlamydia trachomatis among young women in Australia

- Home
  - CME
  - Facharzt-Training
  - Webinare
  - Zeitschriften
  - Bücher
  - e.Medpedia
  - Springer Medizin Podcast – der Talk für Gesundheitsprofis
- Pseudoseite
  - Newsletter
  - Abo-Shop
- Service
  - Jobbörse
  - Info & Hilfe
- Fachgebiete
  - Anästhesiologie
  - Allgemeinmedizin
  - Arbeitsmedizin
  - Augenheilkunde
  - Chirurgie
  - Dermatologie
  - Gynäkologie und Geburtshilfe
  - HNO
  - Innere Medizin
  - Kardiologie
  - Neurologie
  - Onkologie und Hämatologie
  - Orthopädie und Unfallchirurgie
  - Pädiatrie
  - Pathologie
  - Psychiatrie
  - Radiologie
  - Rechtsmedizin
  - Urologie
  - Zahnmedizin
- Themen
  - Klimawandel und Gesundheit
  - Neues aus dem Markt
  - COVID-19
  - Praxis und Beruf
  - Seltene Erkrankungen
  - GOÄ & EBM
  - Panorama
- Sammlungen
  - Kasuistiken
  - Algorithmen & Infografiken
  - Blickdiagnosen
  - Arthropedia
  - FlapFinder
  - Videos
  - Kongressberichterstattung
  - Medizin für Apothekerinnen und Apotheker
  - Für Ärztinnen und Ärzte in Weiterbildung
  - Für Medizinstudierende

SpringerMedizin.de – Mein Fachwissen. Aktuelle, verlässliche Information und Fortbildung für Ärztinnen und Ärzte im Berufsalltag.

#### Direktzugriff

Home


Fachgebiete


CME-Fortbildung


Facharzt-Training


Webinare


Zeitschriften


Bücher


e.Medpedia

#### Meine Inhalte

Meine Lesezeichen


Meine Newsletter


Mein CME (Punktekonto)


Mein e.Med


Meine Zeitschriften


Mein b.Flat


Mein e.Dent

#### Abo-Shop

e.Med Interdisziplinär


e.Med für Ihr Fachgebiet


e.Medpedia


e.Dent


Zeitschriften


Bücher


FlapFinder


Angebote für Kliniken

#### Info- und Hilfeseiten

Info & Hilfe


Kundenservice


Über SpringerMedizin.de


Warum registrieren?


Nachhaltigkeitsinitiative Impuls


Für Autorinnen und Autoren


Für Gutachterinnen und Gutachter


Mediadaten & Werbemöglichkeiten


Jobbörse

#### Folgen Sie uns

Instagram


X


Facebook


YouTube


LinkedIn

#### Rechtliche Informationen

Allgemeine Geschäftsbedingungen


Nutzungsbedingungen


Datenschutzerklärung


Impressum


Cookies verwalten


Verträge hier kündigen

#### Für Mitglieder von Fachgesellschaften

Organ-Zeitschriften


BDC


BDI


DGIIN


DGIM


DGKJ

DGN


DGOU, BVOU, DGU, DGOOC und VLOU


DGRh


DOG


Deutsche Schmerzgesellschaft


ÖGKJ

Springer Nature Logo

© Springer Medizin Verlag GmbH

Version: 0.3578.0
