# Supplementary material
Source: Springer Nature journal article supplement (https://www.springermedizin.de/resource/supplementary/12889_2011_2825_MOESM1_ESM.pdf/9487504)
Supplement: MOESM1 [file 9487504]

***Recruitment of secondary schools***

***Excluded***

- Not meeting inclusion criteria
- Other reasons

***Randomization at school level***

***Intervention condition***

***Control condition***

***Baseline assessment (screening)***

***Intervention condition***

Two 90-minute group sessions at school

***Control condition***

Business as usual

***2 months follow-up measurement after baseline***

***6 months follow-up measurement after baseline***

***12 months follow-up measurement after baseline***
